# Supplementary material for: Frequent, quantitative bone planar scintigraphy for determination of bone anabolism in growing mice
Source: PeerJ. 2021 Dec 9;9:e12355. doi: 10.7717/peerj.12355 (PMC8667748; doi:10.7717/peerj.12355)
Supplement: Supplemental Information 1 [file peerj-09-12355-s001.xlsx]

## Sheet: DATA Figure 3
Investigator 1
	DAYS	F_1	F_2	F_3	M_1	M_2	M_3	M_4	M_5
Acq1	43	9.42e-05	7.6076e-05	7.10773e-05	7.91156e-05	9.02586e-05	0.00010603	8.65906e-05	7.43641e-05
Acq2	52	8.1882e-05	6.47224e-05	5.15719e-05	6.43936e-05	5.00384e-05
Acq 2 bis	58						3.22609e-05	3.38994e-05	3.22989e-05
Acq3	67	3.96016e-05	4.87478e-05	4.39884e-05	3.09557e-05		2.42558e-05	2.8832e-05	4.91504e-05
Acq4	73	3.38632e-05	3.28091e-05	2.52747e-05	3.36275e-05	2.39745e-05	1.90968e-05	2.14169e-05	2.93597e-05
Acq5	80	4.21182e-05	4.66578e-05	4.53123e-05	3.02218e-05	2.82172e-05	2.41829e-05	2.38654e-05	3.33046e-05
Acq6	87	2.91226e-05	2.89115e-05	3.34896e-05	2.21285e-05	1.98356e-05	2.01569e-05	1.79681e-05	2.25244e-05
Acq7	94	1.9376e-05		2.3146e-05	2.41194e-05		1.74987e-05	1.37645e-05	1.79518e-05
Acq8	101	3.94176e-05		2.35706e-05	2.08771e-05		1.38423e-05	1.48759e-05	1.80246e-05
Acq9	115			1.70436e-05	2.23007e-05		1.4117e-05	2.29043e-05
Acq10	123			1.09206e-05	8.89699e-06		8.51072e-06	7.22183e-06	8.29098e-06
Acq11	130			6.70945e-06	7.63143e-06		5.84351e-06	6.73435e-06	7.26688e-06
Acq12	136			1.79539e-05	2.00558e-05		1.01002e-05	1.53435e-05	1.45819e-05
Acq13	157			1.09786e-05	1.7181e-05		1.23849e-06	1.02285e-05	1.36783e-05
Acq14	171			2.38079e-05	1.55584e-05		1.03808e-05	1.08651e-05	1.66523e-05
Acq15	192			1.3725e-05	1.07308e-05		9.73581e-06	1.05431e-05	1.33302e-05
										Investigator 2
											DAYS	F_1	F_2	F_3	M_1	M_2	M_3	M_4	M_5
										Acq1	43	9.32e-05	9.6e-05	8.07e-05	8.13e-05	9.86e-05	0.000112	8.29e-05	7.4e-05
										Acq2	52	7.64e-05	7.77e-05	3.01e-05	7.27e-05	6.02e-05
										Acq 2 bis	58						4.03e-05	3.27e-05	4.16e-05
										Acq3	67	5.03e-05	5.21e-05	4.79e-05	8.96e-06		2.68e-05		4.75e-05
										Acq4	73	4.2e-05	4.51e-05	3.59e-05	4.05e-05	2.88e-05	1.91e-05	2.49e-05	3.53e-05
										Acq5	80	4.44e-05	4.36e-05	3.94e-05	3.53e-05	2.85e-05	2.6e-05	2.43e-05	2.84e-05
										Acq6	87	3.3e-05	3.89e-05	3.17e-05	3.53e-05	2.44e-05	2.22e-05	1.88e-05	2.5e-05
										Acq7	94	2.81e-05		2.95e-05	2.78e-05		1.83e-05	1.39e-05	1.97e-05
										Acq8	101	4.19e-05		2.89e-05	2.16e-05		1.69e-05	1.95e-05	2.34e-05
										Acq9	115			2.53e-05	2.01e-05		1.66e-05	1.32e-05	2.23e-05
										Acq10	123			1.23e-05	9.97e-06		9.9e-06	8.96e-06	1.02e-05
										Acq11	130			1.2e-05	1.03e-05		6.96e-06	7.89e-06	5.07e-06
										Acq12	136			1.76e-05	2.02e-05		1.28e-05	1.79e-05	1.59e-05
										Acq13	157			1.42e-05	1.69e-05		1.29e-06	1.41e-05	1.53e-05
										Acq14	171			2.48e-05	1.85e-05		1.49e-05	1.33e-05	1.89e-05
										Acq15	192
																				Investigator 3
																					DAYS	F_1	F_2	F_3	M_1	M_2	M_3	M_4	M_5
																				Acq1	43	9.96e-05	9.04e-05	7.6e-05	8.52e-05	0.000109	0.000104	6.7e-05	7.04e-05
																				Acq2	52	8.3e-05	8.25e-05	6.13e-05	7.51e-05	5.96e-05
																				Acq 2 bis	58						3.33e-05	2.81e-05	3.19e-05
																				Acq3	67	5.37e-05	5.75e-05	5.01e-05	4.35e-05		2.65e-05	2.78e-05	4.03e-05
																				Acq4	73	3.98e-05	3.78e-05	3.01e-05	3.45e-05	2.81e-05	2.02e-05	1.84e-05	3.13e-05
																				Acq5	80	4.82e-05	4.27e-05	3.96e-05	3.44e-05	3.01e-05	2.43e-05	2.17e-05	2.81e-05
																				Acq6	87	3.73e-05	4.14e-05	3.23e-05	2.52e-05	1.98e-05	1.97e-05	1.68e-05	2.57e-05
																				Acq7	94	2.54e-05		2.37e-05	2.54e-05		1.76e-05	1.31e-05	1.44e-05
																				Acq8	101	4.03e-05			1.69e-05		1.49e-05	1.19e-05	1.75e-05
																				Acq9	115			1.91e-05	1.8e-05		1.28e-05	1.07e-05	1.76e-05
																				Acq10	123			1.1e-05	8.2e-06		8.76e-06	6.17e-06	8.88e-06
																				Acq11	130			9.47e-06	8.61e-06		6.45e-06	6.05e-06	4.87e-06
																				Acq12	136			1.82e-05	1.9e-05		1.38e-05	1.5e-05	1.45e-05
																				Acq13	157			1.36e-05	1.62e-05		1.24e-06	1.02e-05	1.59e-05
																				Acq14	171			2.2e-05	1.53e-05		1.3e-05	1.27e-05	1.52e-05
																				Acq15	192			2.14e-05	1.34e-05		1.23e-05		1.36e-05
																															Investigator 1	Investigator 2	Investigator 3	MEAN
																														Acq1	8.47141e-05	8.98e-05	8.77e-05	8.74047e-05
																														Acq2	6.25216e-05	6.34e-05	7.23e-05	6.60739e-05
																														Acq 2 bis	3.28197e-05	3.82e-05	3.11e-05	3.40399e-05
																														Acq3	3.79331e-05	3.89e-05	4.28e-05	3.98777e-05
																														Acq4	2.74278e-05	3.4e-05	3e-05	3.04759e-05
																														Acq5	3.4235e-05	3.37e-05	3.36e-05	3.3845e-05
																														Acq6	2.42672e-05	2.87e-05	2.73e-05	2.67557e-05
																														Acq7	1.93094e-05	2.29e-05	1.99e-05	2.07031e-05
																														Acq8	1.86583e-05	2.54e-05	2.03e-05	2.14528e-05
																														Acq9	1.75993e-05	1.95e-05	1.56e-05	1.75664e-05
																														Acq10	8.76822e-06	1.03e-05	8.6e-06	9.22274e-06
																														Acq11	6.83712e-06	8.44e-06	7.09e-06	7.45571e-06
																														Acq12	1.56071e-05	1.69e-05	1.61e-05	1.62024e-05
																														Acq13	1.0661e-05	1.24e-05	1.14e-05	1.1487e-05
																														Acq14	1.54529e-05	1.81e-05	1.56e-05	1.63843e-05
																														Acq15	1.1613e-05	1.81e-05	1.52e-05	1.4971e-05

## Sheet: DATA Figure 4
	DAYS	F_1	F_2	F_3	M_2	M_1	M_3	M_4	M_5	Mean	Standard deviation
Acq1	43	11.49	11.61	12.35	12.15	13.23	12.81	11.02	12.85	12.1887	0.767565
Acq2	52	12.92	12.98	13.55	13.7	14.19				13.468	0.529216
Acq3							13.55		14.35	13.95	0.565685
Acq4	67	13.97	14	14.26	14.8	15.01	14.47	14.03	14.6	14.3925	0.392419
Acq5	73	14.19	14.3	14.47	14.94	15.18	14.66	14.25	14.81	14.6	0.35801
Acq6	80	14.42	14.47	14.66	15.2	15.35	14.9	14.38	14.98	14.795	0.369169
Acq7	87	14.65	14.63	14.82	15.43	15.52	15.15	14.57	15.14	14.9888	0.372844
Acq8	94	14.74		14.92		15.61	15.19	14.79	15.21	15.0767	0.327149
Acq9	101	14.88		14.93		15.79	15.28	14.9	15.61	15.2317	0.395445
Acq10	115			15.39		15.88	15.55	15.02	15.54	15.476	0.311496
Acq11	123			15.46		15.98	15.57	15.17	15.83	15.602	0.317285
Acq12	130			15.5		15.84	15.67	15.15	15.61	15.554	0.257158
Acq13	136			15.61		15.74	15.76	15.16	15.67	15.588	0.246516
Acq14	157			15.69		16.11	15.8	15.52	15.87	15.798	0.218792
Acq15	171						15.85			15.85

## Sheet: DATA Figure 5
					Scintigraphy	CT
			Acq1		87.4	12.1887
			Acq2		66	13.468
			Acq3		34	13.95
			Acq4		39.9	14.3925
			Acq5		30.5	14.6
			Acq6		33.8	14.795
			Acq7		26.8	14.9888
			Acq8		20.7	15.0767
			Acq9		21.5	15.2317
			Acq10		17.6	15.476
			Acq11		9.2	15.602
			Acq12		7.5	15.554
			Acq13		16.2	15.588
			Acq14		11.5	15.798
			Acq15		16.4	15.85
